# Supplementary material for: Effects of Enhanced Resistance and Transcriptome Analysis of Twig Blight Disease by Exogenous Brassinolide in Myrica rubra
Source: MDPI journal article supplement (doi:10.3390/antiox13010061), 2023-12-29
Supplement: s1 [file s1]

**Table S1.** Primer sequences for qRT-PCR.

| Gene           | Forward primer          | Reverse primer             |
|----------------|-------------------------|----------------------------|
| <i>MrActin</i> | AATGGAACTGGAATGGTCAAGGC | TGCCAGATCTTCTCCATGTCATCCCA |
| <i>MrPR1</i>   | AGAGGTGGGTGTTGGACCTA    | GCTGCTCCATGCGATGTTTT       |
| <i>MrPR2</i>   | GCTCAGAGGGAGCTGCAAA     | CACTCCCCACCAATACACGA       |
| <i>MrPR5</i>   | GGAGTTCTCTCCGGAAACGG    | CCACAATCACCGGTAAGGCA       |
| <i>MrPR10</i>  | CGGATGGTTCACCTCCTACGG   | ATTGACCGGGATCGCAGAA        |
| <i>MrBAK1</i>  | ATGGCACCAGAATCGCTGTT    | ATGCACCCTCAACGCAGTAT       |
| <i>MrBRI1</i>  | GGTCAACCTCTGCATACCGT    | CCAGCAATCTCCTCGACTCC       |
| <i>MrBZR1</i>  | AGTGGGCAAGTTCCATGCTT    | GAGCTACACAAGCCATTGCG       |
| <i>MrBES1</i>  | TGGCTCCTGAGTTGTTCTACA   | AGTTTGGCTTGAATGGTCTGC      |

**Table S2.** Sequence reads of the transcriptome and their alignment with the reference genome.

| Sample    | Obtained Reads (M) | Obtained Bases(Gb) | Q20(%) | Q30(%) | GC(%) |
|-----------|--------------------|--------------------|--------|--------|-------|
| Mock-1    | 21.31              | 6.35               | 98.38  | 95.43  | 46.63 |
| Mock-2    | 20.45              | 6.12               | 98.19  | 94.85  | 46.46 |
| Mock-3    | 21.41              | 6.41               | 97.45  | 93.06  | 46.75 |
| XJ27-1    | 19.89              | 5.95               | 97.61  | 93.29  | 46.26 |
| XJ27-2    | 19.53              | 5.85               | 97.72  | 93.56  | 46.32 |
| XJ27-3    | 21.93              | 6.57               | 98.05  | 94.31  | 46.26 |
| BL+XJ27-1 | 20.76              | 6.21               | 98.22  | 94.94  | 46.49 |
| BL+XJ27-2 | 20.57              | 6.16               | 98.29  | 95.08  | 46.47 |
| BL+XJ27-3 | 19.41              | 5.81               | 97.04  | 92.09  | 46.9  |
